# Supplementary material for: Nutritional Status and Serum Levels of Micronutrients in an Elderly Group Who Participate in the Program for Complementary Food in Older People (PACAM) from the Metropolitan Region, Santiago de Chile
Source: MDPI journal article supplement (doi:10.3390/nu14010003), 2021-12-21
Supplement: s1 [file s1]

**Table S1.** Food intake of a group of older adults from Metropolitan Region, Santiago, Chile

| Food group                      | Gender group                   |        |                                |                                |                                |        |                                |                                |
|---------------------------------|--------------------------------|--------|--------------------------------|--------------------------------|--------------------------------|--------|--------------------------------|--------------------------------|
|                                 | Males                          |        |                                |                                | Females                        |        |                                |                                |
|                                 | n = 38                         |        |                                |                                | n = 144                        |        |                                |                                |
|                                 | 25 <sup>th</sup><br>percentile | Median | 75 <sup>th</sup><br>percentile | 95 <sup>th</sup><br>percentile | 25 <sup>th</sup><br>percentile | Median | 75 <sup>th</sup><br>percentile | 95 <sup>th</sup><br>percentile |
| Milk drink <i>Años Dorados</i>  | 25.3                           | 39.2   | 48.3                           | 51.0                           | 15.1                           | 37.2   | 45.3                           | 57.0                           |
| Legume soup <i>Años Dorados</i> | 54.0                           | 74.0   | 84.2                           | 100.1                          | 27.5                           | 54.0   | 67.0                           | 83.0                           |
| Bread                           | 80.0                           | 142.9  | 184.6                          | 220.4                          | 59.5                           | 100.3  | 115.3                          | 141.4                          |
| Rice, pasta and cereal products | 19.9                           | 32.5   | 55.0                           | 77.7                           | 13.2                           | 25.0   | 50.0                           | 77.2                           |
| Potato based products           | 77.8                           | 143.9  | 165.2                          | 174.0                          | 60.5                           | 114.9  | 165.0                          | 189.3                          |
| Fruits                          | 29.7                           | 95.6   | 194.0                          | 251.1                          | 49.5                           | 106.8  | 184.3                          | 264.3                          |
| Vegetables                      | 25.6                           | 91.2   | 155.3                          | 221.4                          | 39.1                           | 88.2   | 144.1                          | 275.9                          |
| Beef                            | 36.4                           | 54.3   | 100.0                          | 116.0                          | 28.8                           | 50     | 91.5                           | 98.2                           |
| Chicken                         | 42.7                           | 59.0   | 98.0                           | 118.7                          | 42.7                           | 49     | 64                             | 118.7                          |
| Sausages                        | 16.6                           | 33     | 33                             | 68.0                           | 15.0                           | 33     | 50                             | 60.0                           |
| Low fat milk                    | 0                              | 43     | 119                            | 359.5                          | 143.0                          | 134.3  | 155.0                          | 160.6                          |
| Legumes                         | 19.8                           | 35     | 49.25                          | 67.4                           | 12.8                           | 35.0   | 40.2                           | 72.2                           |
| Sugar                           | 2.0                            | 9      | 13.0                           | 29.6                           | 1.9                            | 7.3    | 11.1                           | 14.7                           |
| Oil                             | 3.5                            | 5      | 7.5                            | 13.1                           | 2.7                            | 5      | 6.6                            | 11.3                           |
